# Supplementary material for: Multimodal theranostic nanomaterials derived from phthalocyanine-based organic salt
Source: Royal Society of Chemistry journal article supplement (doi:10.1039/c5ra00872g), 2015-01-01
Supplement: c5ra00872g1.pdf [file c5ra00872g1.pdf]

## Multimodal Theranostic Nanomaterials Derived from Phthalocyanine-based Organic Salt

Susmita Das<sup>1,3\*</sup>, Paul K. S. Magut<sup>1</sup>, Lijie Zhao<sup>1</sup>, Farhana Hasan,<sup>1</sup> Amar B. Karki<sup>2</sup>, Rongying Jin<sup>2</sup>  
and Isiah M. Warner<sup>1,\*</sup>

<sup>1</sup>Department of Chemistry, Louisiana State University, Baton Rouge, LA-70803, USA

<sup>2</sup>Department of Physics, Louisiana State University, Baton Rouge, LA-70803, USA

<sup>3</sup>Department of Materials Science, Indian Association for the Cultivation of Science, Jadavpur,  
Kolkata-700032, WB, India

\*Corresponding Authors' - email: [ssmtdas@gmail.com](mailto:ssmtdas@gmail.com), [mssd2@iacs.res.in](mailto:mssd2@iacs.res.in); [iwarner@lsu.edu](mailto:iwarner@lsu.edu)

### Supporting Information

## FTIR spectra

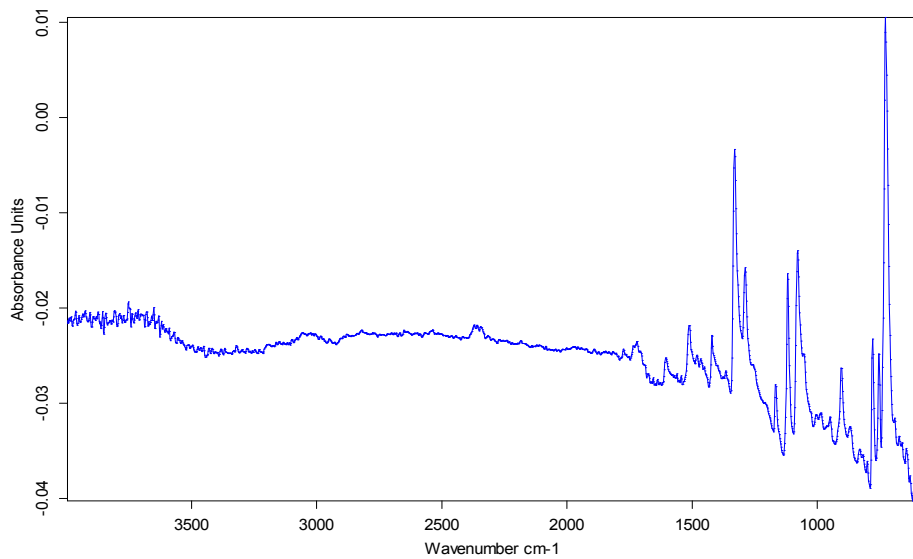

Figure S1A. FTIR spectrum of [Ptc][Cl]

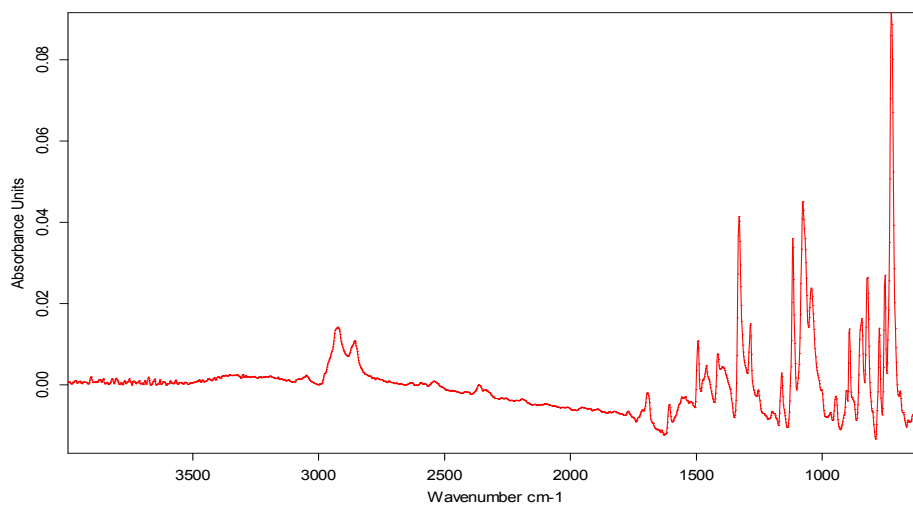

Figure S1B. FTIR spectrum of [Ptc][DC]. The IR band near  $\sim 3000$  cm<sup>-1</sup> corresponding to  $\text{-OH}$  groups present in deoxycholate anion confirms the salt formation.

## $^1\text{H}$ NMR of [Ptc][DC]

$^1\text{H}$ -NMR (DMSO- $d_6$ , 400 MHz): Fe (III) phthalocyanine cation: 7.81 (m, 8H), 7.16 (m, 8H)  
Deoxycholate anion:  $\delta$  4.45 (m, 1H), 4.20 (m, 1H), 3.76 (m, 2H), 2.19 (s, 1H), 2.50 (s, 1H) 1.63-1.14 (m, 24H), 0.90 (s, 3H), 0.88 (s, 3H), 0.57 (s, 3H)

## Size dependent magnetic properties of [Ptc][DC] nanoparticles

Nanoparticles of three different sizes viz. 15-20 nm, 25-35 nm, and 50-65 nm as confirmed from the TEM micrographs were synthesized varying the concentration of the stock dye solution inserted into bulk water during reprecipitation. The temperature dependence of magnetic susceptibility for [Ptc][DC] nanoparticles was found to decrease with increasing particle size demonstrating nearly linear temperature dependence between 2-300 K for the smallest nanoparticle size.

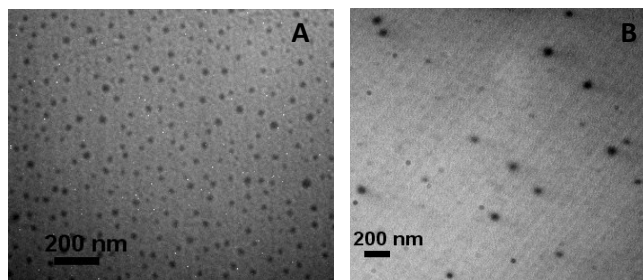

Figure S2: [Ptc][DC] nanoparticles of size (A) 15-20 nm and (B) 50-65 nm.

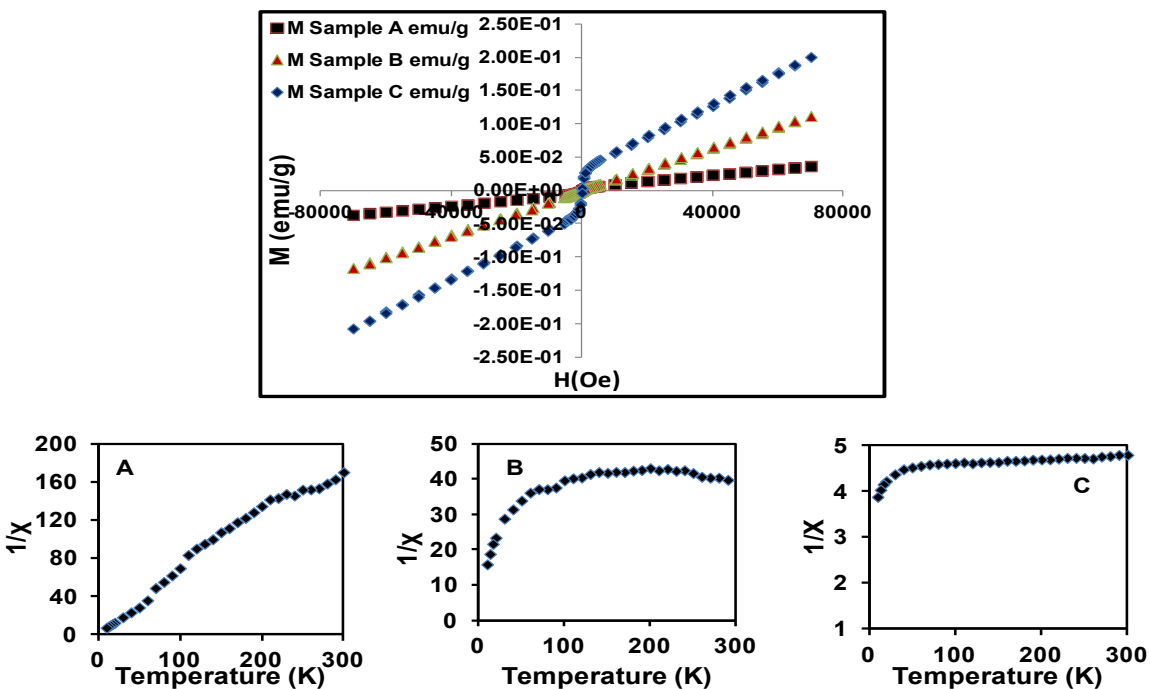

Figure S3: Size dependent magnetic properties of [Ptc][DC] nanoparticles. Sample A 15-20 nm, Sample B 25-35 nm, Sample C 50-65 nm.

#### Stability of [Ptc][DC] Nanoparticles

The stability of [Ptc][DC] nanoparticles were investigated in 10 % serum over a period of 24 h. The fluorescence emission signal of the nanoparticles was followed at 462 nm for excitation at 400 nm. The emission signal was found to remain stable until 8 h and then gradually drop over the studied period. However, the drop in intensity was only 15% over 24 h indicating appreciably high stability of the nanoparticles and absence of any significant serum induced aggregation.

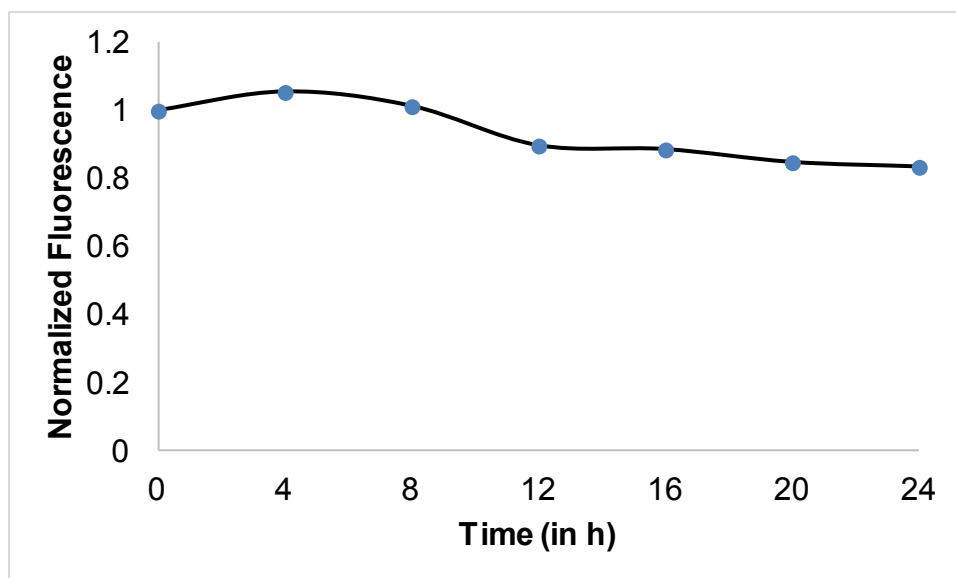

Figure S4: Stability study of [PtC][DC] nanoparticles in 10% Serum
